# Supplementary material for: Inhibition of Neuroblastoma Tumor Growth by Targeted Delivery of MicroRNA-34a Using Anti-Disialoganglioside GD2 Coated Nanoparticles
Source: PubMed Central journal article supplement (PMC3360657; doi:10.1371/journal.pone.0038129), 2012-05-25
Supplement: pone.0038129.s010.pdf [file pone.0038129.s010.pdf]

**A) Homo sapiens TIMP metalloproteinase inhibitor 2 (TIMP2), mRNA**

Sequence source is NCBI Reference Sequence: NM\_003255.4

**Fragment of TIMP2 3'UTR**

ATCAGCTGTAATCATTCCTGTGCTGTGTTTTTTATTACCCTTGGTAGGTATTAGACTT**GCACTTTTTT**AAAAA  
AAGGTTTCTGCATCGTGGAAGCATTGACCCAGAGTGGAACGCGTGGCCTATGCAGGTGGATTCCCTTCAGGTC  
TTTCCTTTGGTTCTTTGAGCATCTTTGCTTTCATTCTCCCGTCTTTGGTT

**TIMP2 3'UTR with deletion of miR-20b seed site:**

CTCGAGATCAGCTGTAATCATTCCCTGTGCTGTGTTTTTTATTACCCTTGGTAGGTATTAGACTT\_AAAAAAAG  
GTTTCTGCATCGTGGAAGCATTGACCCAGAGTGGAACGCGTGGCCTATGCAGGTGGTTCCCTTCAGGTCTTTC  
CTTTGGTTCTTTGAGCATCTTTGCTTTCATTCTCCCGTCTTTGGTT

**B) Primers used for cloning TIMP2 3' UTR fragment**

| <b>oligo name.....</b>  | <b>oligo details</b>                       |
|-------------------------|--------------------------------------------|
| <b>TIMP2-2860-for</b>   | 5'-AAAAAGTCGACATCAGCTGTAATCATTCC-3'        |
| <b>TIMP2-3050-rev</b>   | 5'-AAAAAGTTTAAACCAAAGACGGGAGACG-3'         |
| <b>TIMP2-mut20b-for</b> | 5'-GTAGGTATTAGACTTAAAAAAGGTTTCTGCATCG-3'   |
| <b>TIMP2-mut20b-rev</b> | 5'-TGCTGTGTTTTTTATTACCCTTGGTAGGTATTAGAC-3' |
