# Supplementary material for: Inhibition of Neuroblastoma Tumor Growth by Targeted Delivery of MicroRNA-34a Using Anti-Disialoganglioside GD2 Coated Nanoparticles
Source: PLoS One. 2012 May 25;7(5):e38129. doi: 10.1371/journal.pone.0038129 (PMC3360657; doi:10.1371/journal.pone.0038129)
Supplement: Table S1 — Clinical and biological characteristics of neuroblastoma tumor cohort. (XLSX) [file pone.0038129.s011.xlsx]

## Sheet: parameters
Table S1 Clinical and biological characteristics of neuroblastoma tumor cohort.
Tumor ID	AGE at Diagnosis	INSS STAGE	MYCN Amplification	11q LOH
CHOP106	232	2b	no	no
CHOP108	877	3	yes	no
OLHC196	704	4s	no	yes
OLHC250	610	1	no	no
OLHC270	329	4	yes	no
OLHC272	1310	4	yes	no
OLHC276	1007	3	yes	no
OLHC300	1112	3	yes	no
OLHC339	422	2b	no	no
OLHC408	139	4	no	no
OLHC417	2533	4	no	yes
OLHC455	128	4	no	no
OLHC460	1121	4	no	no
OLHC487	1694	2	no	no
CHOP1040	114	2b	no	no
CHOP1064	1141	3	no	no
CHOP1096	706	3	no	no
CHOP1396	2198	3	no	no
CHOP1551	4629	4	no	no
CHOP1638	2259	4	yes	no
CHOP1643	473	4	yes	no
CHOP1710	370	4	yes	yes
CHOP1729	2426	4	no	yes
CHOP1754	1406	4	no	yes
CHOP1837	1011	3	no	yes
CHOP1853	4781	4	no	no
CHOP1909	547	4	no	no
CHOP1915	2039	4	no	yes
CHOP2119	947	4	no	no
CHOP2122	1568	4	no	no
CHOP2128	552	3	no	no
CHOP2142	1330	4	no	yes
CHOP2158	918	3	no	no
CHOP2161	1462	4	no	yes
CHOP2165	564	4	yes	no
CHOP2171	1089	4	no	yes
CHOP2221	1961	4	no	yes
CHOP2227	1366	4	no	yes
CHOP2238	507	4	yes	no
CHOP2239	781	2a	no	yes
CHOP2291	1631	2a	no	no
CHOP2315	47	2a	no	no

## Sheet: codes
local_id
nrc_patient_id	if available
nrc_origin	Amsterdam, Essen etc
date_birth	ddmmyy
date_diagn	ddmmyy
age_diagn_days	only if no date of birth/diagnose
sex	male -M, female-F
diagnose	NB, GNB, GN
histology	NB: undifferentiated, poorly differentiated, or differentiating; GNB: intermixed or composit; GN: Maturing or mature
stage_inss	1,2a,2b, 3,4,4S
site-primary	adrenal, abomen, thoracal etc
site_metastasis	bone marrow, bone, liver, lymph gland etc or NA
date_relapse	ddmmyy or NA
date_progression	ddmmyy or NA
time to relapse/progression_days	only if no date of diagnose/event (specify days/months)
site relapse/progression	local or distant
date_death	ddmmyy or NA
time to death	only of no date of diagnosis/death (specify days/months)
cause_death	tumor, toxic, other
date_last_follow-up	ddmmyy or lost for follow-up
status_follow_up	alive / treatment / dead
site_biopsy	adrenal, abomen, thoracal, lymphnode etc
MYCN_copy number	CN (or ampl / normal)
1p	del (or imbal / gain)
17q	gain (or imbal / del))
11q	del (or imbal /gain)
ferritine	number + normal reference
LDH	number + normal reference
ploidy	DNA-index
treatm_observation only	Yes or No
protocol	if avaiable
treatm_surgery	Yes or No
treatm_chemo	Yes or No
treatm_highdose	Yes or No
treatm_RA	Yes or No
treatm_MIBG	Yes or No
treatm_other
Review_pathology	Yes or No
remark
syndrome
